# Supplementary material for: Assembly of CNS Nodes of Ranvier in Myelinated Nerves Is Promoted by the Axon Cytoskeleton
Source: PubMed Central journal article supplement (PMC5387178; doi:10.1016/j.cub.2017.01.025), 2017-04-03
Supplement: mmc1.pdf [file mmc1.pdf]

**Current Biology, Volume 27**

**Supplemental Information**

**Assembly of CNS Nodes of Ranvier in Myelinated  
Nerves Is Promoted by the Axon Cytoskeleton**

**Veronica Brivio, Catherine Faivre-Sarrailh, Elior Peles, Diane L. Sherman, and Peter J. Brophy**

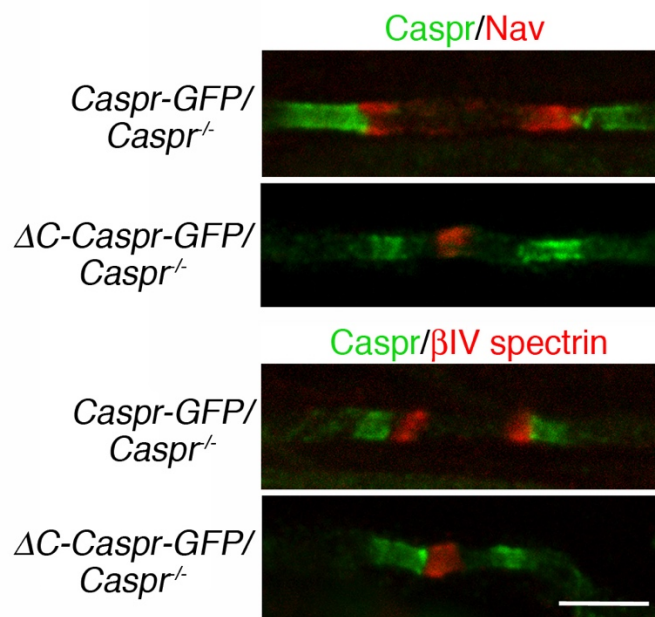

**Figure S1. The absence of the Protein 4.1B binding domain of Caspr also impairs the formation of heminodal clusters in the PNS. Related to Figure 2.**

Immunofluorescence analysis at P3 of sciatic nerves from *Caspr-GFP/Caspr<sup>-/-</sup>* and *ΔC-Caspr-GFP/Caspr<sup>-/-</sup>* mice for Caspr and the nodal proteins Nav and βIV spectrin. Quantitation of  $\geq 63$  pairs of converging Schwann cells for the nodal proteins Nav, βIV spectrin or ankyrinG for each genotype showed that the percentages of symmetrical heminodes were as follows *Caspr-GFP/Caspr<sup>-/-</sup>*,  $89.0 \pm 0.3$  (n = 2); *C-Caspr-GFP/Caspr<sup>-/-</sup>*,  $12.0 \pm 3.0$  (n = 3); mean  $\pm$  SEM,  $P \leq 0.0002$ , Unpaired Student's t test. The scale bar represents 5  $\mu\text{m}$ .
